# Supplementary material for: Perceptions of the State Policy Environment and Adoption of Medications in the Treatment of Substance Use Disorders
Source: Atypon-hosted journal article supplement (doi:10.1176/appi.ps.201100034), 2012-01-01
Supplement: pss6301_19_ds.pdf [file pss6301_19_ds.pdf]

Table 1: Bivariate Results

|                                                           | Full Sample*                                 | Methadone Excluded Sample                    |
|-----------------------------------------------------------|----------------------------------------------|----------------------------------------------|
| Perceived SSA Support                                     |                                              |                                              |
| Medication Adopters                                       | mean=2.6±0.9                                 | mean = 2.5±0.9                               |
| Medication Non-adopters                                   | mean=2.1±0.9                                 | mean = 2.1±0.9                               |
| <i>t</i> -test                                            | <i>t</i> =-3.58, <i>p</i> <.001              | <i>t</i> =-3.07, <i>p</i> <.01               |
| Rates of Medication Adoption by Policy Awareness Typology |                                              |                                              |
| Neither Medicaid nor state contract funding               | 19%                                          | 16%                                          |
| Medicaid but not state contract funding                   | 46%                                          | 42%                                          |
| State contract funding but not Medicaid                   | 36%                                          | 33%                                          |
| Both policies (Medicaid and state contract funding)       | 79%                                          | 69%                                          |
| Chi-square test                                           | $\chi^2=52.8$ , <i>df</i> =3, <i>p</i> <.001 | $\chi^2=35.3$ , <i>df</i> =3, <i>p</i> <.001 |

\*These statistics are reported in the manuscript on page 13.

We then re-estimated the multivariate model of medication adoption with the methadone adopters excluded from the sample. Table 2 (please see next page) presents these new results alongside the original odds ratios from the manuscript. In the methadone-excluded analysis, perceived SSA support remains significantly associated with medication adoption, with nearly identical odds ratios. Similar to the original results, programs aware of at least one medication on the Medicaid formulary were more likely to have adopted at least one SUD medication than those aware of neither policy. Awareness of the state contract policy continued to be non-significant, as it was in the original analysis. The difference based on awareness of both policies was on the cusp of significance (*p*=.053), once the methadone-offering programs were excluded.

Table 2: Multivariate Models of Medication Adoption

| Variable                                                        | Full Sample Odds Ratio* | <i>p</i> -value | Methadone Excluded Odds Ratio | <i>p</i> -value |
|-----------------------------------------------------------------|-------------------------|-----------------|-------------------------------|-----------------|
| Perceived state policy environment                              |                         |                 |                               |                 |
| Single state agency's support for medications                   | 2.25                    | .001            | 2.27                          | .002            |
| Typology of awareness of state funding policies for medications |                         |                 |                               |                 |
| Neither Medicaid nor state contract funding                     | Reference               |                 | Reference                     |                 |
| Medicaid but not state contract funding                         | 3.00                    | .03             | 2.89                          | .04             |
| State contract funding but not Medicaid                         | 2.00                    | .26             | 2.18                          | .22             |
| Both policies (Medicaid and state contract funding)             | 3.92                    | .02             | 3.49                          | .053            |

|                                                                |      |      |      |      |
|----------------------------------------------------------------|------|------|------|------|
| Organizational characteristics                                 |      |      |      |      |
| Government-owned (vs. privately owned)                         | 1.40 | .54  | 1.38 | .57  |
| Located in a health care setting (vs. non-health care setting) | 1.89 | .23  | 2.15 | .16  |
| Accredited by external organization (vs. not accredited)       | 3.09 | .005 | 3.27 | .005 |
| Offers detoxification services (vs. not offered)               | 4.13 | .02  | 3.85 | .03  |
| Only offers outpatient treatment (vs. not outpatient-only)     | .55  | .18  | .66  | .37  |
| Number of physicians on staff                                  | 2.85 | .002 | 2.86 | .003 |
| Number of physicians on contract                               | 1.94 | .003 | 1.82 | .011 |
| Number of nurses on staff                                      | 1.49 | .004 | 1.48 | .008 |
| Twelve-step treatment orientation                              | .82  | .33  | .81  | .29  |

---

\*These are the odds ratios reported in Table 2 of the manuscript.
